# Supplementary material for: Association of cerebral white matter hyperintensities with coronary artery calcium in a healthy population: a cross-sectional study
Source: Springer Nature journal article supplement (doi:10.1038/s41598-022-25654-9), 2022-12-13
Supplement: MOESM1 [file 41598_2022_25654_MOESM1_ESM.pdf]

Supplementary data for:

**Association of Cerebral White Matter Hyperintensities with Coronary Artery Calcium in a Healthy Population: A Cross-Sectional Study**

Jinyoung Choi<sup>1</sup>, MD; Jung Youn Kim<sup>2</sup>, MD; Heon-Ju Kwon<sup>1</sup>, MD, PhD; Hye Jeong Choi<sup>2</sup>, MD; Sang Heum Kim<sup>2</sup>, MD; Sinae Kim<sup>3</sup>; Jungbin Lee<sup>4</sup>, MD; and Ji Eun Park<sup>5</sup>, MD, PhD

<sup>1</sup>Department of Radiology, Kangbuk Samsung Hospital, Sungkyunkwan University School of Medicine, Seoul 03181, Republic of Korea

<sup>2</sup>Department of Radiology, CHA Bundang Medical Center, CHA University, Seongnam 13496, Republic of Korea

<sup>3</sup>Division of Biostatistics, Department of R&D Management, Kangbuk Samsung Hospital, Sungkyunkwan University School of Medicine, Seoul 03181, Republic of Korea

<sup>4</sup>Department of Radiology, Soonchunhyang University Bucheon Hospital, Bucheon 14584, Republic of Korea

<sup>5</sup>Department of Radiology and Research Institute of Radiology, University of Ulsan College of Medicine, Asan Medical Center, Seoul 05505, Republic of Korea

**Corresponding Author:** Jung Youn Kim, M.D.

Department of Radiology, CHA Bundang Medical Center, CHA University, 59 Yatap-ro,  
Bundang, Seongnam, Gyeonggi-do 13496, Republic of Korea

Phone: 82-31-780-5371

E-mail address: [cleopiece@gmail.com](mailto:cleopiece@gmail.com)

**Supplementary Figure:**

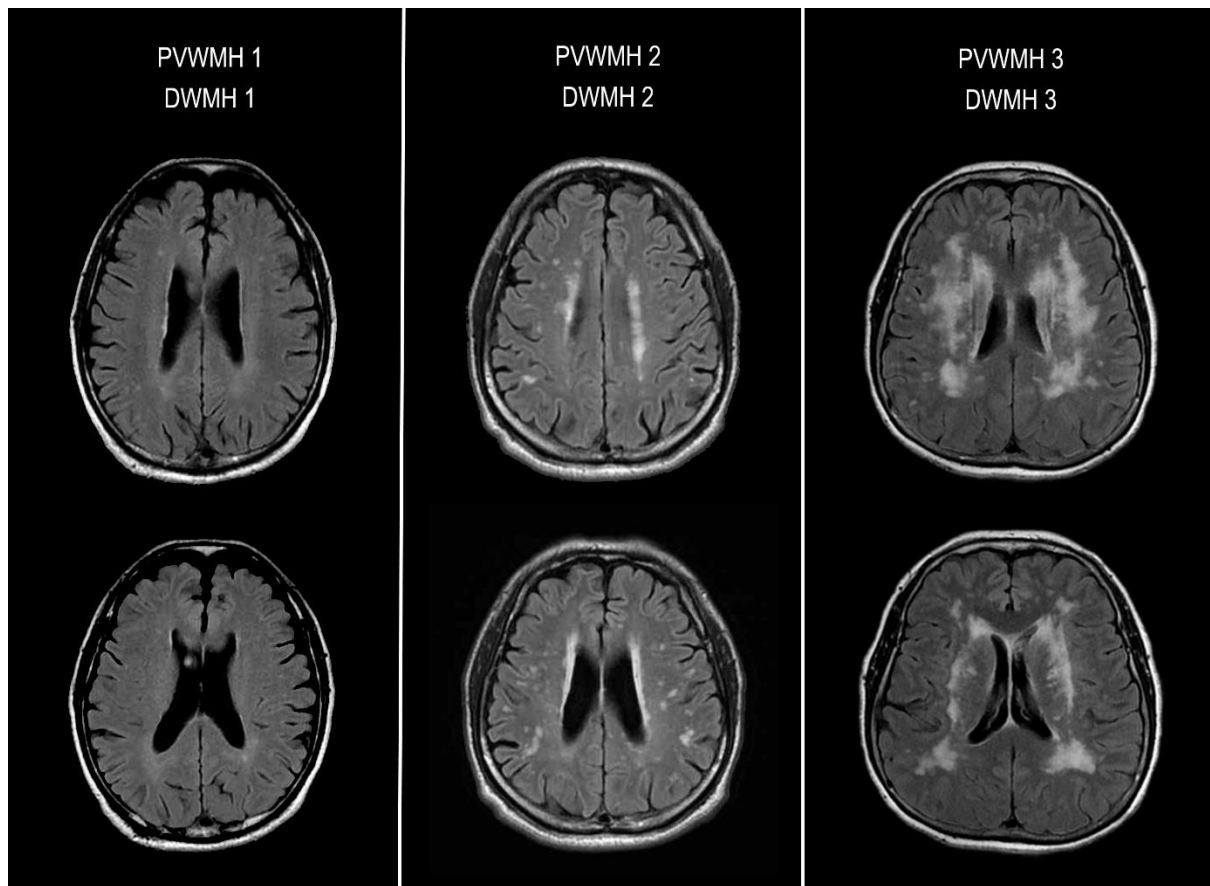

**Supplementary Figure 1.** Examples of the visual assessment for cerebral white matter hyperintensity according to the Fazekas score. PVWMH indicates periventricular white matter hyperintensity; DWMH, deep white matter hyperintensity.

**Supplementary Table:**

**Supplementary Table 1.** The variance inflation factors of the variables in multivariable regression analysis

|                               | Variance inflation factor |                      |                      |
|-------------------------------|---------------------------|----------------------|----------------------|
|                               | Model 1 <sup>b</sup>      | Model 2 <sup>c</sup> | Model 3 <sup>d</sup> |
| Age                           | 1.4                       | 1.53                 | 1.54                 |
| Sex                           | 1.18                      | 1.49                 | 1.49                 |
| CAC score                     | 1.25                      | 1.37                 | 1.39                 |
| Body mass index               |                           | 1.15                 | 1.15                 |
| Hypertension                  |                           | 1.16                 | 1.16                 |
| Diabetes                      |                           | 1.1                  | 1.12                 |
| Dyslipidemia                  |                           | 1.06                 | 1.06                 |
| Current or former smoker      |                           | 1.32                 | 1.33                 |
| Regular exercise <sup>a</sup> |                           | 1.07                 | 1.07                 |
| History of CAD                |                           | 1.06                 | 1.07                 |
| Homocysteine                  |                           | 1.05                 | 1.05                 |
| ICAS                          |                           |                      | 1.08                 |

CAC, coronary artery calcium; CAD, coronary artery disease; and ICAS, intracranial artery stenosis.

<sup>a</sup> Regular engagement in vigorous exercise for more than 10 minutes at least 3 times per week.

<sup>b</sup> Adjusted for age and sex.

<sup>c</sup> Adjusted for Model 1 + atherosclerotic risk factors (BMI, hypertension, diabetes, dyslipidemia, current or former smoker, regular exercise, history of CAD, and homocysteine level).

<sup>d</sup> Adjusted for Model 2 + ICAS.
